# Supplementary material for: Simultaneous realization of structure manipulation and emission enhancement in NaLuF4 upconversion crystals
Source: Royal Society of Chemistry journal article supplement (doi:10.1039/c5tc02733k), 2015-01-01
Supplement: c5tc02733k1.pdf [file c5tc02733k1.pdf]

## Supporting Information

### Simultaneous realization of structure manipulation and emission enhancement in NaLuF<sub>4</sub> upconversion crystals

Hao Lin<sup>1</sup>, Dekang Xu<sup>1</sup>, Anming Li<sup>1</sup>, Dongdong Teng<sup>1</sup>, Shenghong Yang<sup>1</sup> and Yueli Zhang<sup>\*1,2</sup>

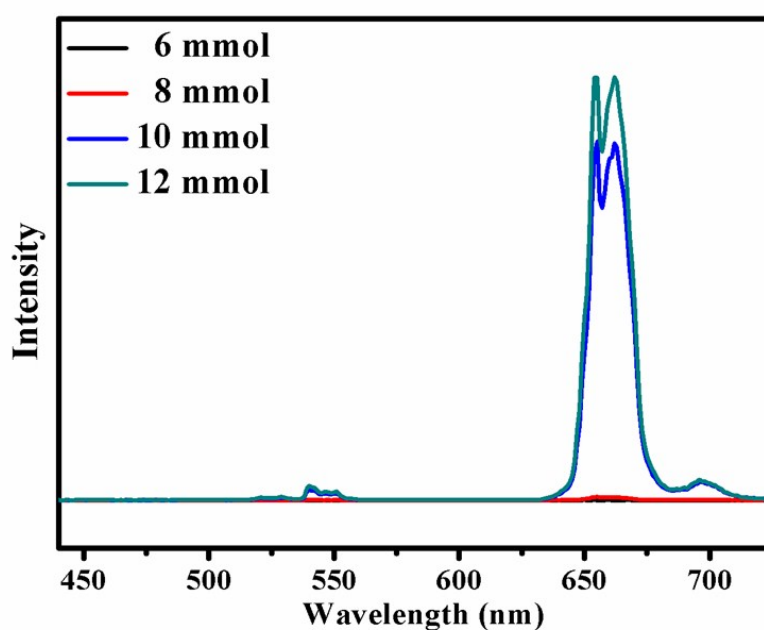

**Fig. S1** UC luminescence spectra of NaLuF<sub>4</sub>:20%Yb<sup>3+</sup>, 15%Er<sup>3+</sup>, 1%Tm<sup>3+</sup> nano/micro-crystals with different NaF contents at 180 °C for 12 h under 980 nm laser excitation.

<sup>1</sup> State Key Laboratory of Optoelectronic Materials and Technologies, School of Physics and Engineering, Sun Yat-sen University, Guangzhou 510275, PR China.

\* Correspondence to: Yueli Zhang, E-mail: [stszyl@mail.sysu.edu.cn](mailto:stszyl@mail.sysu.edu.cn)

<sup>2</sup> State Key Laboratory of Crystal Material, Shandong University, Jinan 250100, PR China.

## Supporting Information

---

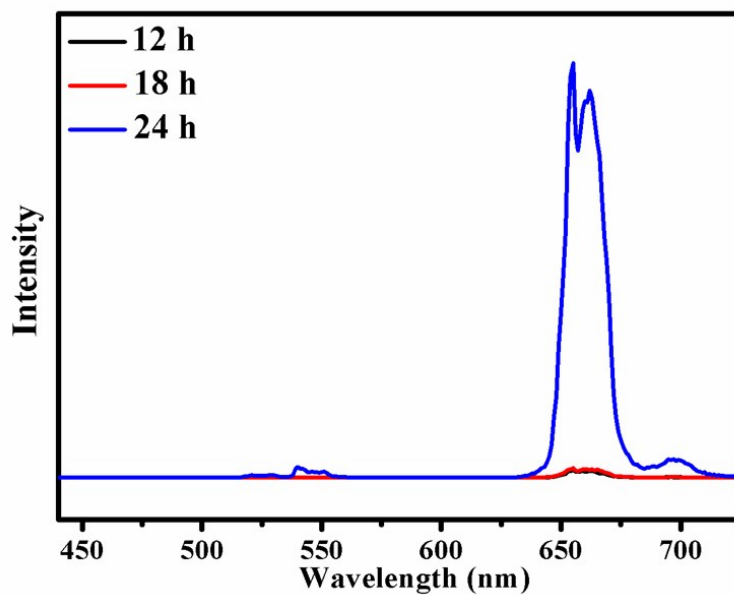

**Fig. S2** UC luminescence spectra of  $\text{Gd}^{3+}$ -absent  $\text{NaLuF}_4:20\%\text{Yb}^{3+}, 15\%\text{Er}^{3+}, 1\%\text{Tm}^{3+}$  nano/micro-crystals synthesized by adding 8 mmol NaF at 180 °C for different reaction times under 980 nm laser excitation.

## Supporting Information

---

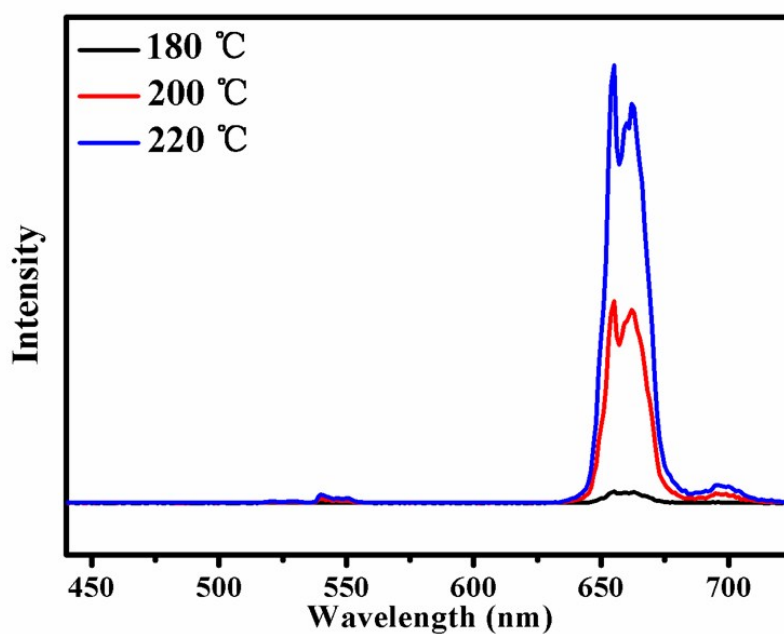

**Fig. S3** UC luminescence spectra of Gd<sup>3+</sup>-absent NaLuF<sub>4</sub>:20%Yb<sup>3+</sup>, 15%Er<sup>3+</sup>, 1%Tm<sup>3+</sup> nano/micro-crystals synthesized by adding 8 mmol NaF at different reaction temperatures for 12 h under 980 nm laser excitation.
